# Supplementary material for: Macrophage Phenotypes and Gene Expression Patterns Are Unique in Naturally Occurring Metabolically Healthy Obesity
Source: MDPI journal article supplement (doi:10.3390/ijms232012680), 2022-10-21
Supplement: s1 [file s1]

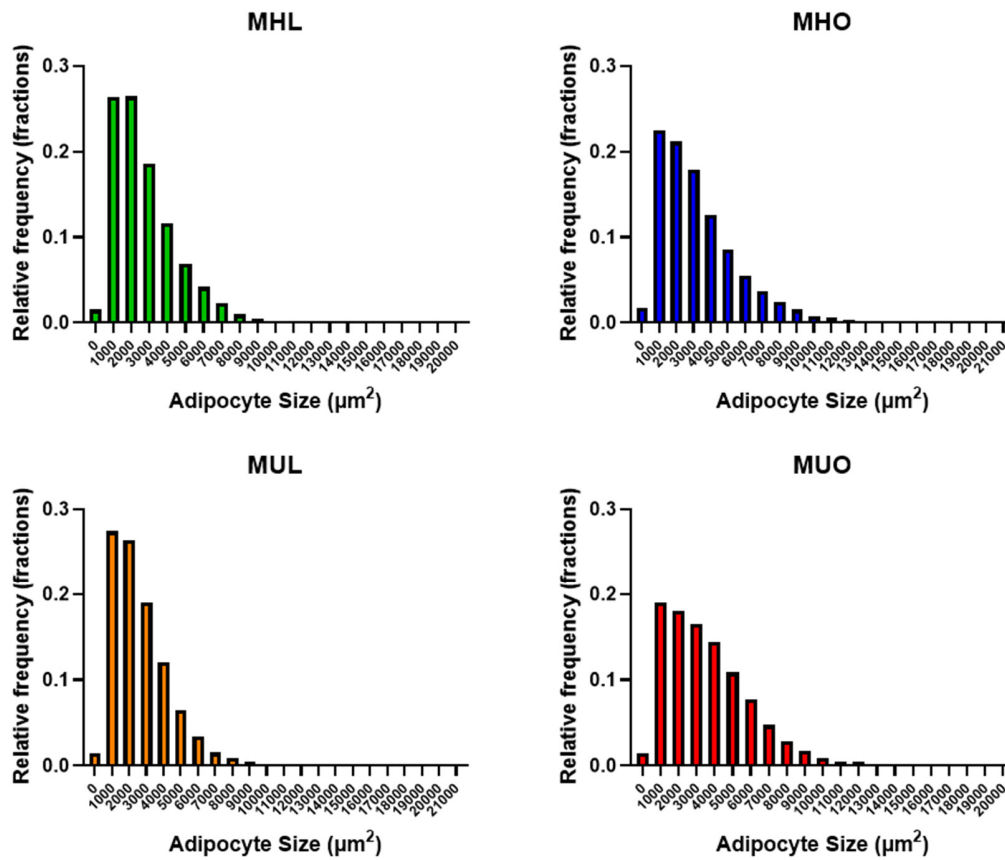

**Supplementary Figure S1. Nonhuman primate subcutaneous adipose tissue adipocyte size frequency distributions.** Adipocyte size frequency distributions for each metabolic health group. MHL = metabolically healthy lean (n=12); MHO = metabolically healthy obese (n=10); MUL = metabolically unhealthy lean (n=9); MUO = metabolically unhealthy obese (n=13).

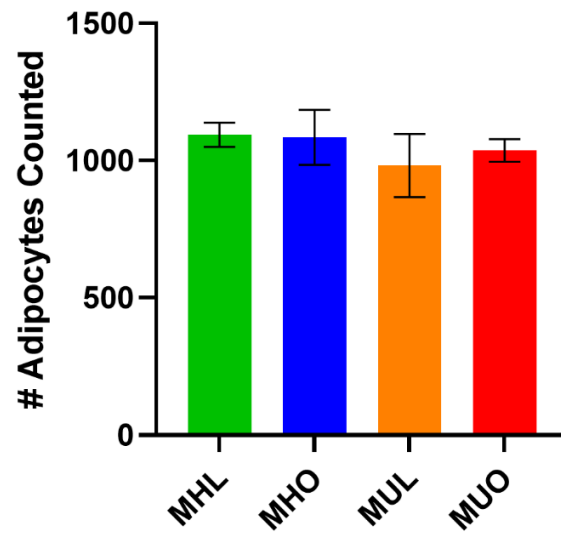

**Supplementary Figure S2. Number of adipocytes evaluated.** The total number of adipocytes counted for all animals in each group did not differ ( $p>0.05$ ). MHL = metabolically healthy lean ( $n=12$ ); MHO = metabolically healthy obese ( $n=10$ ); MUL = metabolically unhealthy lean ( $n=9$ ); MUO = metabolically unhealthy obese ( $n=13$ ).

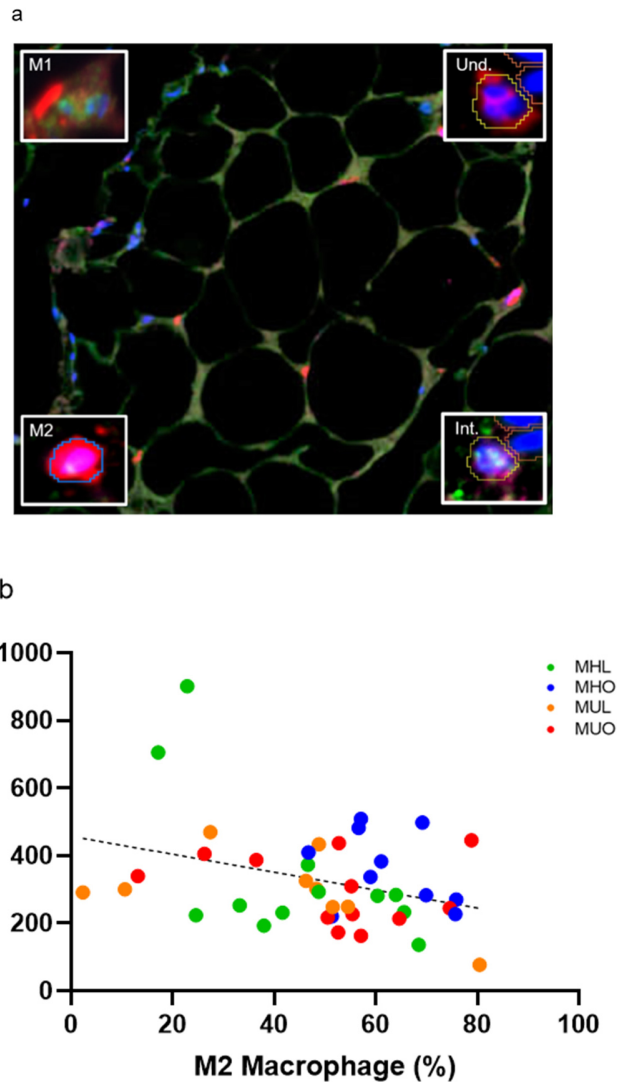

**Supplementary Figure S3. Anti-inflammatory M2 adipose tissue (AT) macrophages negatively correlate with circulating monocyte chemoattractant protein (MCP)-1.** (a) Example image of the immunofluorescent staining used to identify four macrophage subtypes. M1 macrophages were identified as CD163+CD8+pSTAT1+ and stained green. M2 macrophages were identified as CD163+CD68+CMAF+ and stained magenta. Undefined (Und) macrophages were identified as CD163+CD68+ and were stained red. Intermediate (Int) macrophages were identified as CD163+CD68+CMAF+pSTAT1+. Nuclei were stained with DAPI and appeared blue. The image was taken at 40x magnification. (b) A correlation analysis revealed that circulating monocyte chemoattractant protein (MCP)-1 is negatively associated with the percentage of M2 macrophages present in subcutaneous (SQ) adipose ( $r=-0.34$ ,  $p=0.03$ ,  $n=43$ ). This association likely indicates that as more anti-inflammatory M2 macrophages inhabited the SQ adipose, secretion of pro-inflammatory MCP-1 decreased.

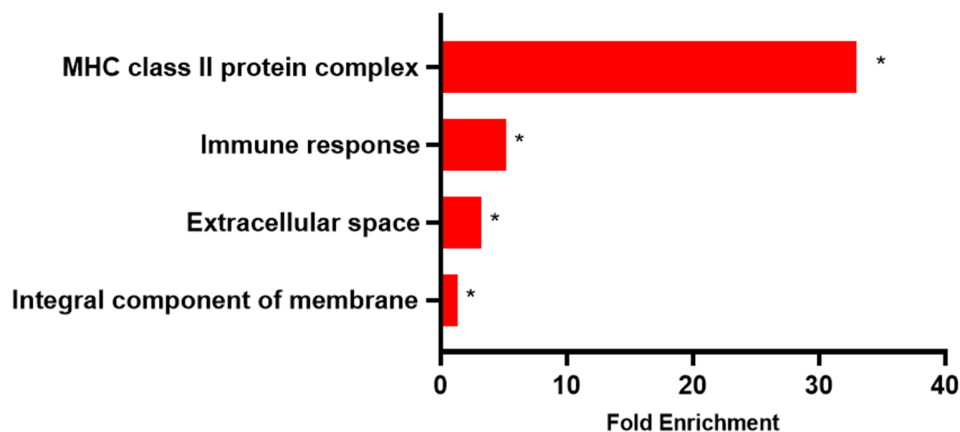

**Supplementary Figure S4. Gene ontology term pathways enriched in metabolically unhealthy obese (MUO) subcutaneous adipose compared to metabolically unhealthy lean (MUL).** The added effect of obesity on poor metabolic health results in upregulation of pathways related to immune response and expansion. Pathways displayed remained statistically significant (\*= $p < 0.05$ ) after false discovery rate and multiple comparisons corrections (MUL  $n=9$ ; MUO  $n=13$ ).

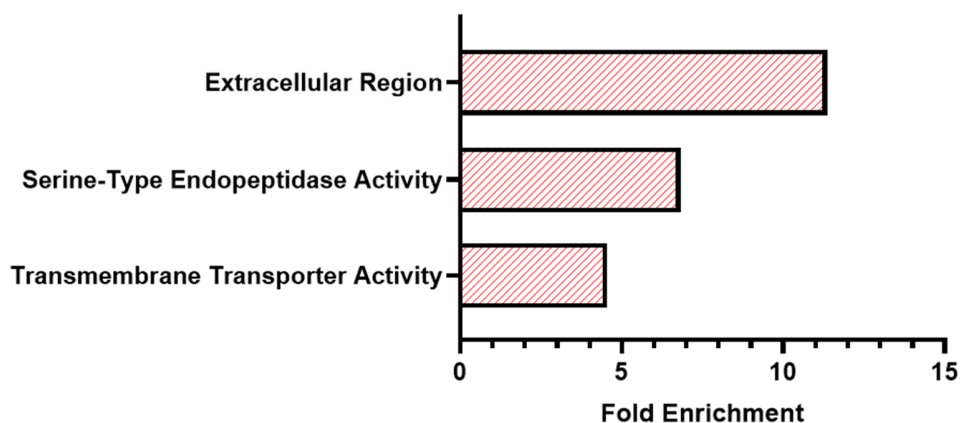

**Supplementary Figure S5. Gene ontology term pathways enriched in the metabolically healthy obese (MHO) subcutaneous adipose compared to the metabolically unhealthy obese (MUO).** Healthy obesity results in muted upregulation of term pathways associated with moving nutrients across membranes. However, the pathways shown did not survive false discovery rate and multiple comparisons corrections, so the data cannot be further interpreted. (MHO  $n=10$ ; MUO  $n=13$ ). Hatched bars indicate values that did not reach statistical significance ( $p > 0.05$ ).

a

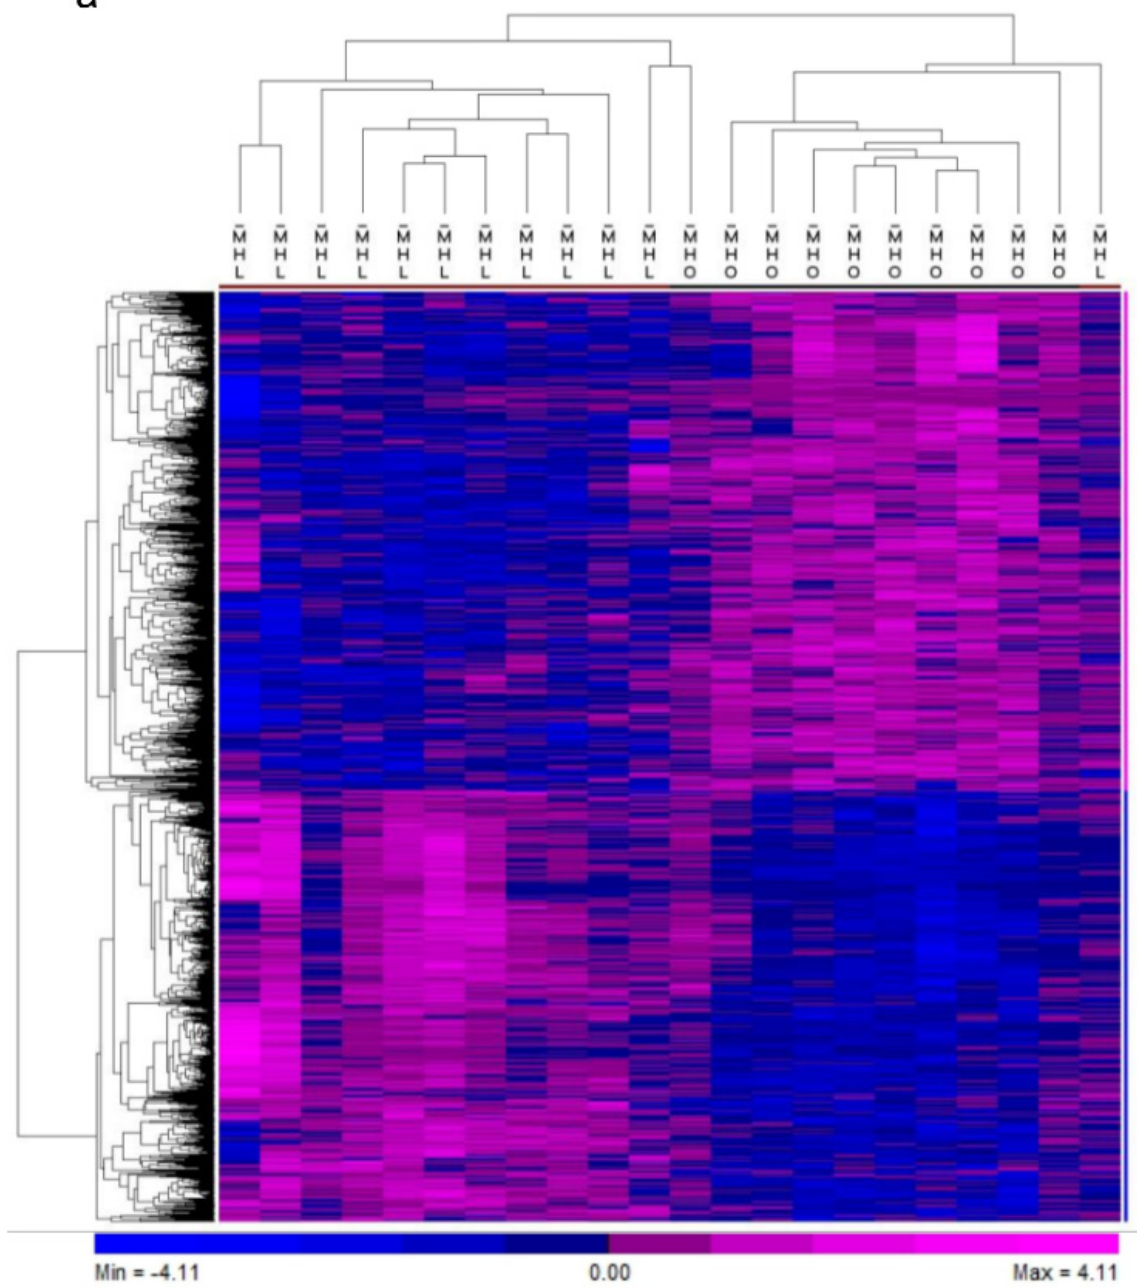

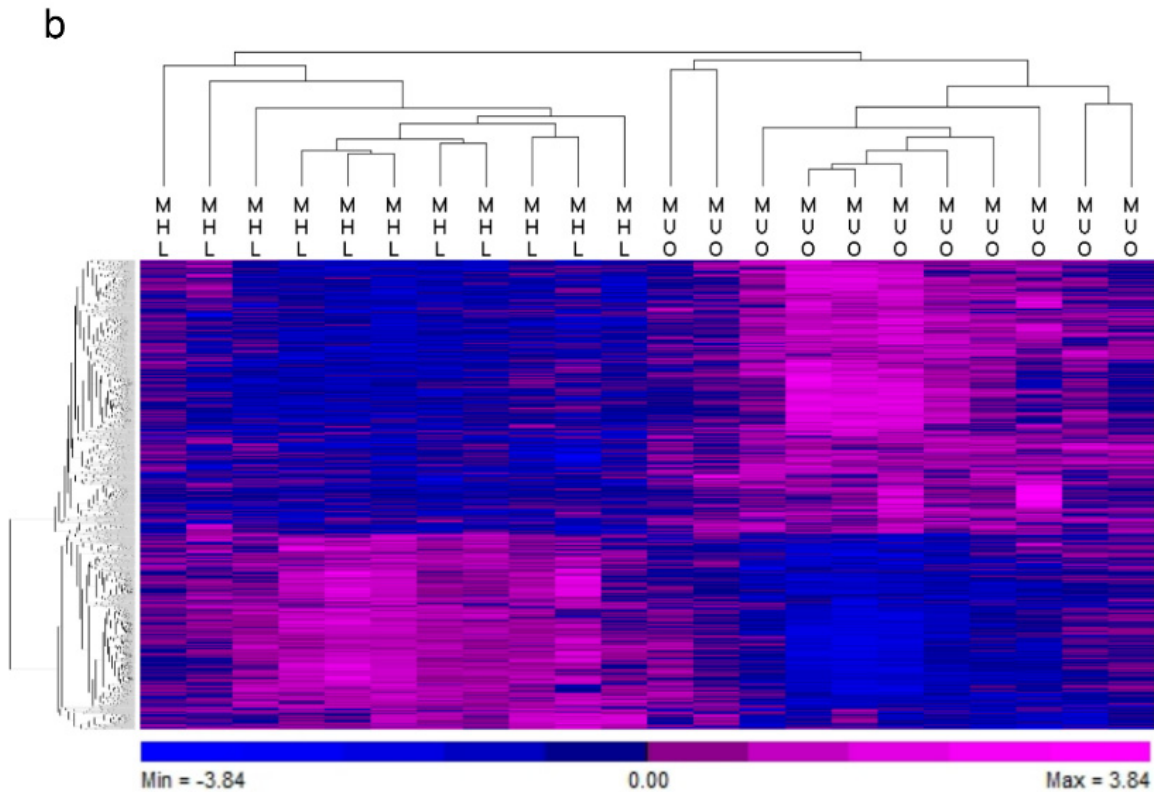

**Supplementary Figure S6. Heat maps of differentially expressed genes between the two obese groups and the metabolically healthy lean (MHL) reference group.** (a) A heat map of differentially expressed genes (DEGs) between the MHL (n=12) and metabolically healthy obese (MHO; n=10) groups. Purple coloration indicates gene upregulation while blue coloration indicates gene down regulation. Genes upregulated in MHO subcutaneous adipose tissue (SQ AT) are downregulated in MHL SQ AT and vice versa. Top differentially expressed gene (DEG) changes are tabulated in Table 2. Specific transcripts are not denoted in this heat map. (b) A heat map of DEGs between the MHL and the metabolically unhealthy obese (MUO; n=13) groups. The top DEGs are tabulated in Table 3. Genes upregulated in the MUO SQ AT are downregulated in the MHL SQ AT. Specific transcripts are not denoted in this heat map.

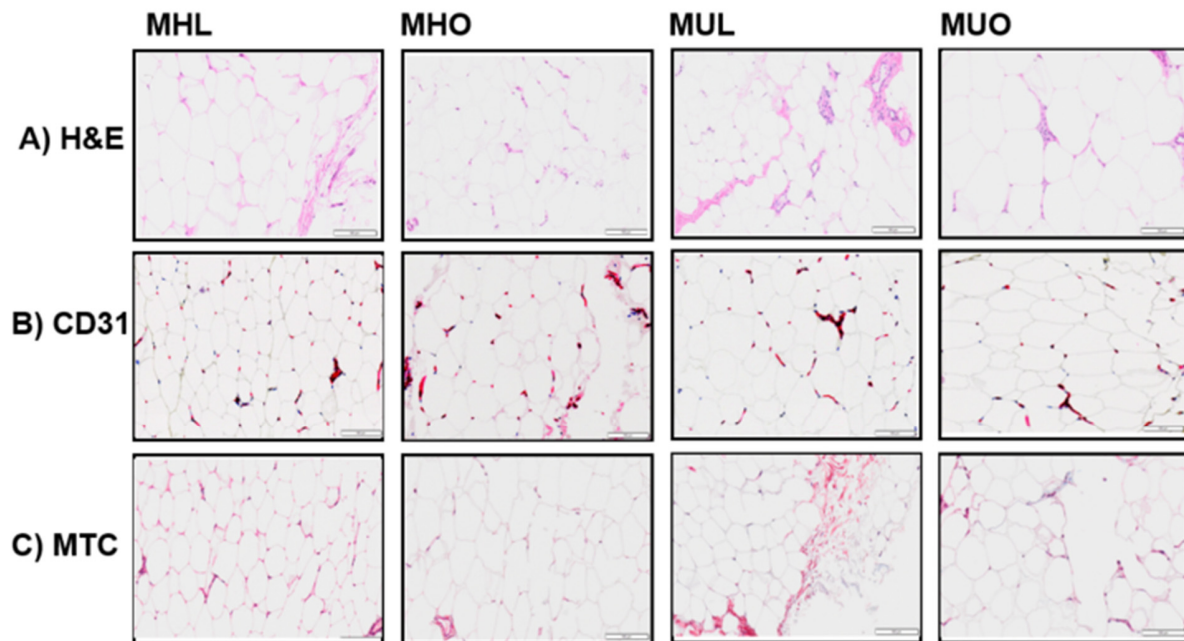

**Supplementary Figure S7. No differences in adipocyte size, endothelial cell area, or fibrosis were seen between health groups.** Example images from an individual from each phenotypic group of (A) hematoxylin and eosin (H&E) staining that was quantified to determine adipocyte size, (B) CD31 staining that was quantified to determine endothelial cell area, and (C) Masson's trichrome (MTC) staining that was quantified to determine tissue fibrosis. All scale bars are set to 100µm. MHL=metabolically healthy lean (n=12); MHO=metabolically healthy obese (n=10); MUL=metabolically unhealthy lean (n=9); MUO=metabolically unhealthy obese (n=13).

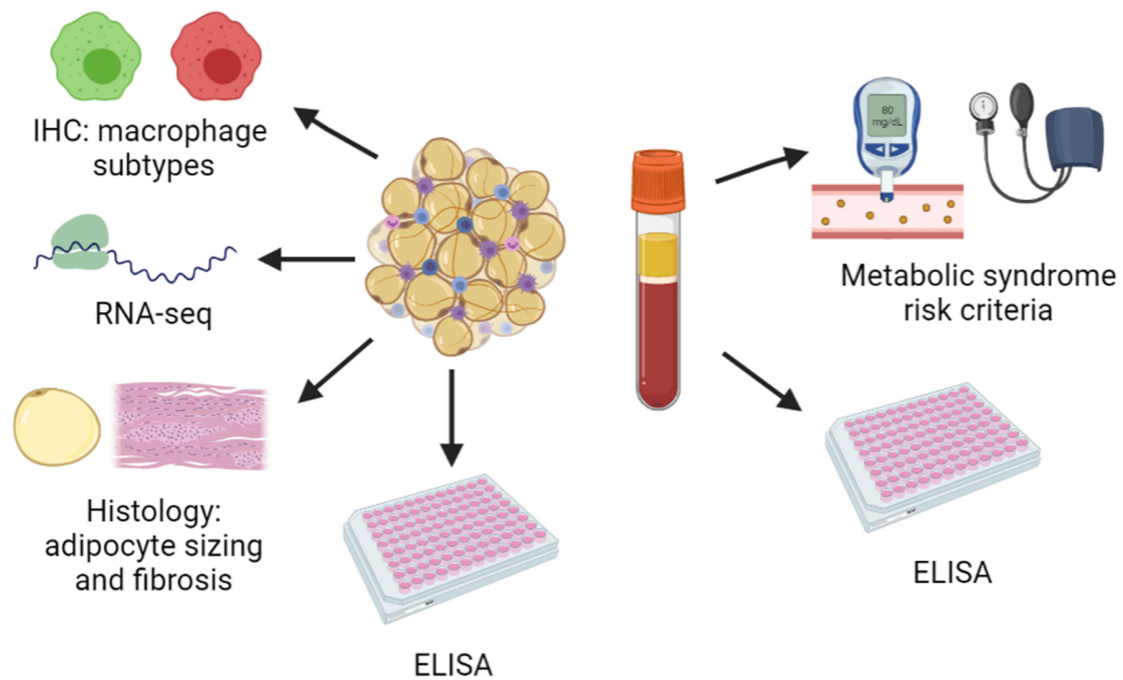

**Supplementary Figure S8. Depiction of the methods performed on biological samples.** Immunohistochemical analyses of macrophage subtypes, histological evaluations of adipocyte sizes and fibrosis, RNA-seq, and enzyme-linked immunosorbent assays (ELISA) were performed using collected subcutaneous adipose tissue. ELISAs and analyses of metabolic syndrome risk factors were performed using collected whole blood and isolated plasma (BioRender.com).



| Measurement                                  | Value      |
|----------------------------------------------|------------|
| Waist Circumference (cm)                     | $\geq 40$  |
| Fasting Blood Glucose (mg/dL)                | $\geq 100$ |
| Glycosylated Hemoglobin A1c (%)              | $\geq 6$   |
| High Density Lipoprotein Cholesterol (mg/dL) | $\leq 50$  |
| Triglycerides (mg/dL)                        | $\geq 125$ |
| Systolic Blood Pressure (mmHg)               | $\geq 135$ |
| Diastolic Blood Pressure (mmHg)              | $\geq 85$  |

**Supplementary Table S1. Metabolic syndrome risk factor cut-off values for group selection.** The glycaemia, dyslipidemia, and hypertension cut-off values used were equivalent to those used for humans. The waist circumference cut-off value defined obesity and was adjusted for nonhuman primates specifically. A waist circumference of >40cm corresponds with the upper 20th percentile of the vervet research colony animals [1], a percentile that corresponds with the Adult Treatment Panel III risk waist definition [1-4]. The sum of each metabolic syndrome (MetS) criterion met determined the MetS score [5]. Metabolically healthy lean animals had a MetS score of zero, metabolically healthy obese animals had a MetS score of one, and unhealthy animals had MetS scores of two or higher.

| Measurement                                  | MHL                 | MHO                 | MUL                 | MUO                 | ANOVA p-Value | Health p-Value | Obesity p-Value |
|----------------------------------------------|---------------------|---------------------|---------------------|---------------------|---------------|----------------|-----------------|
| Macrophage Density (cells/ $\mu\text{m}^2$ ) | 0.000008 (0.000001) | 0.000009 (0.000002) | 0.000006 (0.000001) | 0.000007 (0.000002) | 0.75          | 0.45           | 0.44            |
| Total Cell Density (cells/ $\mu\text{m}^2$ ) | 0.000296 (0.000027) | 0.000296 (0.000015) | 0.000296 (0.000028) | 0.000316 (0.000026) | 0.91          | 0.68           | 0.69            |
| M1 Macrophages (%)                           | 0.68 (0.29)         | 0.23 (0.11)         | 0.29 (0.12)         | 1.16 (0.50)         | 0.18          | 0.35           | 0.65            |
| M2 Macrophages (%)                           | 44.27 (5.12)        | 62.26 (3.17)        | 41.14 (7.99)        | 51.45 (5.40)        | 0.06          | 0.23           | 0.03            |
| Intermediate Macrophages (%)                 | 2.76 (0.88)         | 1.75 (0.50)         | 0.62 (0.26)         | 3.03 (1.33)         | 0.29          | 0.83           | 0.52            |
| Undefined Macrophages (%)                    | 52.28 (5.77)        | 35.76 (3.15)        | 57.95 (8.19)        | 44.36 (5.65)        | 0.07          | 0.26           | 0.07            |

**Supplementary Table S2. Subcutaneous adipose macrophage subtype distributions by group.** All data are presented as means with SEM in parentheses. Macrophage density did not differ by group (metabolically healthy lean [MHL] n=12, metabolically healthy obese [MHO] n=10, metabolically unhealthy lean [MUL] n=9, metabolically unhealthy obese [MUO] n=13). Pre-determined power analyses using previously collected data indicated that we would have 80% power to detect a 1.5 standard deviation difference in M2/M1 macrophage ratio between groups with n=11 animals per group. Post-hoc power analyses using our M2/M1 macrophage ratio data and n=9 per group indicated that we achieved 100% power to detect differences in this endpoint.

| Transcript         | Log Fold Change | Unadjusted p-Value | Adjusted p-Value |
|--------------------|-----------------|--------------------|------------------|
| DAPL1              | -2.040          | 0.00724            | >0.05            |
| GJB5               | -1.964          | 0.00059            | >0.05            |
| TSPO2              | -1.957          | 0.00089            | >0.05            |
| ANO9               | -1.607          | 0.00726            | >0.05            |
| CCL22              | -1.514          | 0.00043            | >0.05            |
| SLC22A16           | -1.476          | 0.00729            | >0.05            |
| SLC38A8            | -1.381          | 0.00145            | >0.05            |
| EVPL               | -1.304          | 0.00925            | >0.05            |
| CCL19              | -1.298          | 0.00947            | >0.05            |
| PERM1              | -1.271          | 0.00981            | >0.05            |
| SDCBP2             | -1.238          | 0.00290            | >0.05            |
| FAM167A            | -1.177          | 0.00520            | >0.05            |
| TPSD1              | -1.145          | 0.00234            | >0.05            |
| ENSCSAG00000018573 | -1.139          | 0.00793            | >0.05            |
| FGF11              | -1.136          | 0.00029            | >0.05            |
| FRMD5              | -1.021          | 0.00441            | >0.05            |
| CRABP1             | -0.989          | 0.00962            | >0.05            |
| ENSCSAG00000018536 | -0.966          | 0.00059            | >0.05            |
| ENSCSAG00000019447 | -0.958          | 0.00727            | >0.05            |
| ANKRD9             | -0.914          | 0.00020            | >0.05            |
| TMEM176B           | -0.880          | 0.00871            | >0.05            |
| RAPGEFL1           | -0.848          | 0.00894            | >0.05            |
| PRRT3              | -0.706          | 0.00644            | >0.05            |
| EXOC3L4            | -0.656          | 0.00561            | >0.05            |
| FN1                | 0.646           | 0.00684            | >0.05            |
| RIC3               | 0.663           | 0.00699            | >0.05            |
| PCSK4              | 0.671           | 0.00958            | >0.05            |
| NAGS               | 0.687           | 0.00767            | >0.05            |
| ASPN               | 0.689           | 0.00449            | >0.05            |
| SLC22A3            | 0.731           | 0.00241            | >0.05            |
| COL8A1             | 0.741           | 0.00712            | >0.05            |
| F2RL2              | 0.745           | 0.00184            | >0.05            |
| ENSCSAG00000003488 | 0.758           | 0.00560            | >0.05            |
| ENSCSAG00000000419 | 0.808           | 0.00287            | >0.05            |
| ENSCSAG00000018189 | 0.827           | 0.00538            | >0.05            |
| NPTXR              | 0.884           | 0.00788            | >0.05            |
| SYN2               | 0.909           | 0.00678            | >0.05            |
| ENSCSAG00000018243 | 0.970           | 0.00428            | >0.05            |
| C6orf201           | 0.984           | 0.00807            | >0.05            |
| TPPA               | 1.010           | 0.00678            | >0.05            |
| ENSCSAG00000017715 | 1.016           | 0.00317            | >0.05            |
| SLC10A6            | 1.133           | 0.00548            | >0.05            |
| ITGBL1             | 1.200           | 0.00574            | >0.05            |
| GUCY2D             | 1.205           | 0.00362            | >0.05            |
| ENSCSAG00000011474 | 1.245           | 0.00148            | >0.05            |
| IZUMO1R            | 1.256           | 0.00226            | >0.05            |
| LTBP2              | 1.264           | 0.00183            | >0.05            |
| NKX3-1             | 1.275           | 0.00263            | >0.05            |
| CA8                | 1.299           | 0.00312            | >0.05            |
| HTRA4              | 1.346           | 0.00391            | >0.05            |
| GSX2               | 1.357           | 0.00924            | >0.05            |

|                    |       |         |       |
|--------------------|-------|---------|-------|
| P4HA3              | 1.365 | 0.00226 | >0.05 |
| SDR42E2            | 1.393 | 0.00302 | >0.05 |
| ASB5               | 1.454 | 0.00375 | >0.05 |
| ENSCSAG00000009497 | 1.516 | 0.00609 | >0.05 |
| COMP               | 1.724 | 0.00062 | >0.05 |

**Supplementary Table S3. All differentially expressed transcripts in the metabolically healthy obese (MHO) compared to the metabolically unhealthy obese (MUO) subcutaneous adipose tissue.** MHO (n=10) demonstrated upregulation of nutrient transport transcripts and downregulation of inflammation-associated transcripts compared to the MUO (n=13). However, genes listed did not survive corrections for multiple corrections.

| Gene ID  | r-Value | p-Value |
|----------|---------|---------|
| SKIDA1   | 0.560   | 0.00014 |
| ARHGEF33 | 0.484   | 0.00134 |
| HCN3     | 0.463   | 0.00232 |
| NKD1     | 0.462   | 0.00234 |
| KANSL3   | 0.458   | 0.00258 |
| IFT172   | 0.441   | 0.00387 |
| ZRANB3   | 0.440   | 0.00399 |
| ZBTB37   | 0.415   | 0.00704 |
| TTLL11   | 0.408   | 0.00810 |
| CACNB2   | 0.393   | 0.01104 |
| FAM8A1   | 0.382   | 0.01377 |
| ZBTB40   | 0.367   | 0.01834 |
| RWDD4    | 0.354   | 0.02311 |
| TBC1D8B  | 0.348   | 0.02590 |
| TRDMT1   | 0.337   | 0.03123 |
| ABCC2    | 0.315   | 0.04483 |
| ARPC5L   | -0.303  | 0.05393 |
| REEP4    | -0.324  | 0.03867 |
| CNKSR1   | -0.374  | 0.01592 |
| HSPA14   | -0.385  | 0.01282 |
| KIFC3    | -0.389  | 0.01203 |
| IGHD     | -0.398  | 0.00988 |
| GRID2IP  | -0.409  | 0.00796 |
| SEPTIN4  | -0.416  | 0.00682 |
| CDKN1A   | -0.419  | 0.00646 |
| LRRC3C   | -0.420  | 0.00621 |
| ZDHHC5   | -0.421  | 0.00612 |
| FOSL1    | -0.427  | 0.00540 |
| FAM160A2 | -0.428  | 0.00526 |
| KCNG1    | -0.429  | 0.00515 |
| MS4A1    | -0.430  | 0.00500 |
| RDH16    | -0.435  | 0.00451 |
| HSF4     | -0.436  | 0.00436 |
| ALAS1    | -0.469  | 0.00200 |
| RAB20    | -0.555  | 0.00017 |

**Supplemental Table S4. Statistically significant associations between gene-specific transcript expression levels and the subcutaneous adipose tissue M2/M1 ratio (n=43).** Associations were considered when transcripts were detectable in  $\geq 21$  of the animal subjects. Pearson correlations were used to determine associations.

| Measurement          | Sample | MHL             | MHO             | MUL              | MUO             | ANOVA<br>p-Value | Health<br>p-Value | Obesity<br>p-Value |
|----------------------|--------|-----------------|-----------------|------------------|-----------------|------------------|-------------------|--------------------|
| MCP-1 (pg/mL)        | Plasma | 353.09 (70.73)  | 349.60 (34.11)  | 315.42 (33.04)   | 277.13 (29.11)  | 0.61             | 0.35              | 0.92               |
| Adiponectin (ng/mL)  | Plasma | 66.50 (8.99)    | 73.90 (9.45)    | 99.32 (11.16)    | 71.76 (14.05)   | 0.17             | 0.07              | 0.59               |
| PAI-1 (ng/mL)        | Plasma | 6.66 (1.96)     | 7.01 (1.79)     | 2.95 (0.57)      | 8.84 (2.47)     | 0.36             | 0.80              | 0.21               |
| IL-6 (pg/mL)         | Plasma | 5.28 (0.74)     | 10.39 (3.18)    | 7.44 (2.80)      | 7.20 (1.74)     | 0.35             | 0.93              | 0.93               |
| IL-1 $\beta$ (pg/mL) | Plasma | 1.61 (0.37)     | 3.28 (0.79)     | 3.74 (1.04)      | 3.43 (1.14)     | 0.48             | 0.55              | 0.91               |
| MCP-1 (pg/mL)        | SQ AT  | 3.98 (0.80)     | 8.52 (2.75)     | 6.72 (2.11)      | 10.98 (2.76)    | 0.24             | 0.06              | 0.02*              |
| IL-10 (pg/mL)        | SQ AT  | 53.47 (8.28)    | 24.23 (4.64)    | 46.12 (8.59)     | 27.05 (4.05)    | 0.03*            | 0.99              | 0.004*             |
| TGF $\beta$ (pg/mL)  | SQ AT  | 1766.38 (93.82) | 1844.47 (73.54) | 2220.74 (194.39) | 1847.16 (66.42) | 0.09             | 0.08              | 0.38               |

**Supplementary Table S5. Cytokines measured in circulation and in protein extracted from subcutaneous adipose explants.**

All data are presented as means with SEM in parentheses (metabolically healthy lean [MHL] n=12; metabolically healthy obese [MHO] n=10; metabolically unhealthy lean [MUL] n=9; metabolically unhealthy obese [MUO] n=13). Circulating cytokines did not differentiate groups. However, tissue measures of interleukin-10 (IL-10) differed between groups (overall ANOVA p=0.03) and by obesity status (p=0.004). Tissue levels of monocyte chemoattractant protein-1 (MCP-1) also differed by obesity status (p=0.02), while transforming growth factor  $\beta$  (TGF- $\beta$ ) demonstrate a trend toward differing between groups (overall ANOVA p=0.09) and by health status (p=0.08).

| Measurement     | MHL          | MHO         | MUL         | MUO          | ANOVA<br>p-Value | Health<br>p-Value | Obesity<br>p-Value |
|-----------------|--------------|-------------|-------------|--------------|------------------|-------------------|--------------------|
| % Positive CD31 | 1.08 (0.15)  | 1.21 (0.23) | 1.27 (0.18) | 1.41 (0.20)  | 0.64             | 0.54              | 0.59               |
| % Positive MTC  | 0.08 (0.015) | 0.10 (0.02) | 0.76 (0.64) | 0.10 (0.019) | 0.39             | 0.37              | 0.50               |

**Supplemental Table S6. Tissue vasculature and fibrosis did not differ by group, health or obesity status.** All data are presented as tissue positive staining area means with SEM in parentheses (metabolically healthy lean [MHL] n=12; metabolically healthy obese [MHO] n=10; metabolically unhealthy lean [MUL] n=9; metabolically unhealthy obese [MUO] n=13).

| Measurement             | MHL    | MHO    | MUL     | MUO    | p-Value |
|-------------------------|--------|--------|---------|--------|---------|
| Relatedness Coefficient | 0.0118 | 0.0171 | 0.00977 | 0.0156 | >0.05   |

**Supplemental Table S7. The familial relational coefficients of animals in each metabolic health group.** All data are presented as medians (metabolically healthy lean [MHL] n=12; metabolically healthy obese [MHO] n=10; metabolically unhealthy lean [MUL] n=9; metabolically unhealthy obese [MUO] n=13). The animals' relatedness in each group was not significantly different.



## References

1. Kavanagh, K., et al., Characterization and heritability of obesity and associated risk factors in vervet monkeys. 2007. 15(7): p. 1666-1674.
2. Detection, N.C.E.P.E.P.o. and T.o.H.B.C.i. Adults, Third report of the National Cholesterol Education Program (NCEP) Expert Panel on detection, evaluation, and treatment of high blood cholesterol in adults (Adult Treatment Panel III). 2002: The Program.
3. Lean, M., T. Han, and C.J.B. Morrison, Waist circumference as a measure for indicating need for weight management. 1995. 311(6998): p. 158-161.
4. Palaniappan, L., et al., Predictors of the incident metabolic syndrome in adults: the Insulin Resistance Atherosclerosis Study. 2004. 27(3): p. 788-793.
5. Kavanagh, K., et al., Regulators of mitochondrial quality control differ in subcutaneous fat of metabolically healthy and unhealthy obese monkeys. *Obesity*, 2017. 25(4): p. 689-696.
